# Supplementary material for: Effects of fermented wheat germ on the placenta of high-fat diet-induced obese maternal rats: morphology, metabolism, and nutrient transport
Source: Royal Society of Chemistry journal article supplement (doi:10.1039/d4fo05828c), 2025-01-01
Supplement: d4fo05828c1.pdf [file d4fo05828c1.pdf]

**Table S1:** The components of wheat germ and fermented wheat germ.

| Components              | WG                        | FWG                       |
|-------------------------|---------------------------|---------------------------|
| Ash (%)                 | 8.33 ± 0.08 <sup>b</sup>  | 9.23 ± 0.08 <sup>a</sup>  |
| Protein (%)             | 41.71 ± 1.23 <sup>a</sup> | 20.39 ± 0.17 <sup>b</sup> |
| Total sugar (%)         | 34.78 ± 0.47 <sup>b</sup> | 52.77 ± 1.35 <sup>a</sup> |
| Total dietary fibre (%) | 5.96 ± 0.15 <sup>b</sup>  | 13.94 ± 0.3 <sup>a</sup>  |
| Fat (%)                 | 0.06 ± 0.007 <sup>a</sup> | 0.05 ± 0.007 <sup>a</sup> |
| Total phenols (mg/g)    | 5.76 ± 0.31 <sup>b</sup>  | 8.64 ± 0.11 <sup>a</sup>  |

The data were presented as mean ± standard deviation. Different superscript lowercase letters denote statistically significant differences.

**Table S2:** Primer sequences used in Real-time PCR

| Genes | Sequences (5'-3')           |                            |
|-------|-----------------------------|----------------------------|
| GAPDH | F: GGGTGTGAACCACGAGAAAT     | R: ACTGTGGTCATGAGCCCTTC    |
| GLUT1 | F: AGGAGATGAAAGAAGAGGGTTCG  | R: GTGTTGACGATACCCGAGCC    |
| GLUT2 | F: AACAGCCTCTCGTTGACTGG     | R: TGGAGCAATCTCGCCAATGT    |
| GLUT3 | F: CATCTCCGTTGTCCTCCAGT     | R: GCTCCAATCGTGGCATAGAT    |
| GLUT4 | F: GACCCGCCCTTTGCACACCA     | R: TCACTCGCTGCTGAGGGGGT    |
| SGLT1 | F: GACTGATTCTCGGCTTCCTG     | R: CAGATGATCTTGGGGCAGTT    |
| FATP1 | F: TCGCACAGCTAGACACCTACTCC  | R: CCAGGAACACAGCCACCACATC  |
| FATP4 | F:GGGTGCCAACAACAAGAAGATTGC  | R: TGCGGTCTCGGAAGTACAGGTAG |
| FATP5 | F: CTGCCAAGCTTCGTGCTAAT     | R: GACCCGCTCATGTGATAGGA    |
| FABP1 | F: ACCTCATTGCCACCATGAAC     | R: CTTCCCTTCATGCACGATTT    |
| FABP2 | F: GAGGCCAAGCGGATCTTTA      | R: TGCATTATCAGCGAGATGGA    |
| FABP3 | F: ACAGGAAGGTCAAGTCGGTC     | R: ATGGGTGAGAGTCAGGATGAG   |
| FABP4 | F: TGTGGGGACCTGGAAACTCGT    | R: CGAAGCCAACCTCCACTTCTTT  |
| SNAT1 | F: GAGCACAGGCGACATTCTCATCC  | R: GACATGGCGACACAGGTGGAAC  |
| SNAT2 | F: TCCGTTACCTCCTCCTCAAGAC   | R: CCAGCCAGACCGTATGCCTTATG |
| SNAT4 | F: CGAAGAAGGTAGAGGCGGGAAAGG | R: AGTTCCCATCCCGGTGTAG     |
| SNAT9 | F: TGCTGCTATGAACAAGCGGA     | R: CGTGGTCTGGAGCAATCAGT    |
| LAT1  | F: TAGCCAATCTGGATCCCAAG     | R: TCAAGTAATTCCATCCCCCA    |
| LAT2  | F:GCTGGAAGAAGCCTGACATC      | R: ATACAGGAACACCCGTCAGC    |

**Table S3:** Information about the antibodies used in WB.

| Antibodies     | Catalog number | Manufacturers |
|----------------|----------------|---------------|
| mTOR           | 66888-1-Ig     | Sanying       |
| S6K            | 14485-1-AP     | Sanying       |
| AMPK           | AF6423         | Affinity      |
| 4EBP1          | AF6432         | Affinity      |
| p-mTOR         | 67778-1-Ig     | Sanying       |
| p-S6K          | AF3228         | Affinity      |
| p-AMPK         | AF3423         | Affinity      |
| p-4EBP1        | AF3830         | Affinity      |
| $\beta$ -actin | AC026          | ABclonal      |

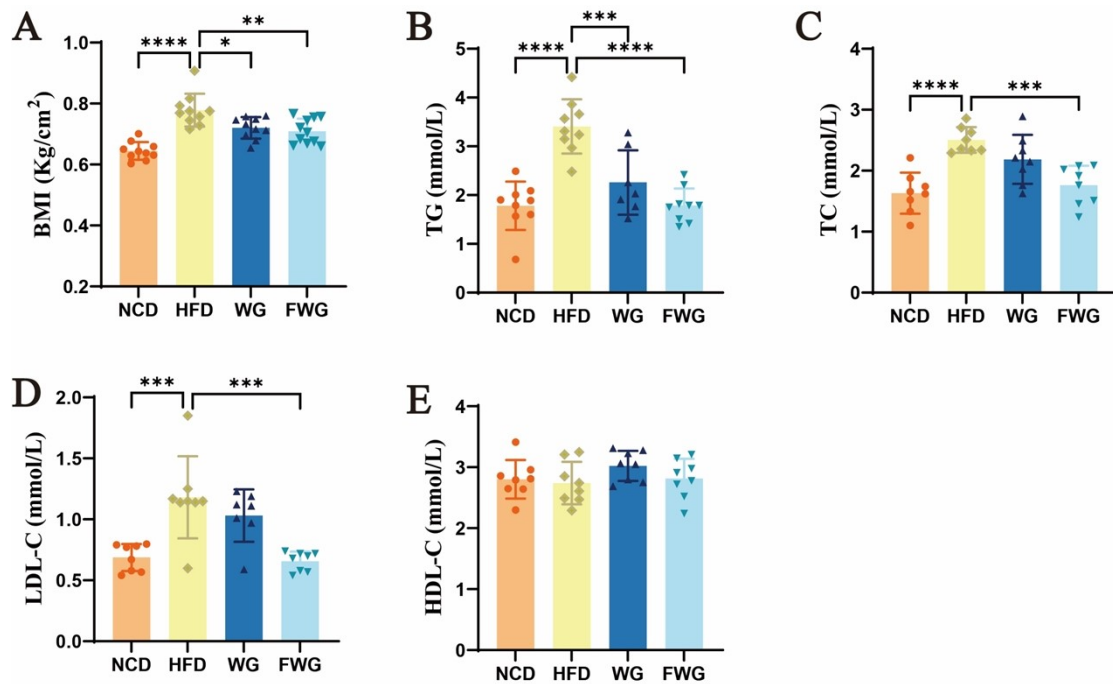

Fig.S1. The effects of FWG on pre-pregnancy BMI and serum levels of TG, TC, LDL-C, and HDL-C in rats with HFD-induced maternal obesity. (A) BMI (B) TG, (C) TC, (D) LDL-C, (E) HDL-C.

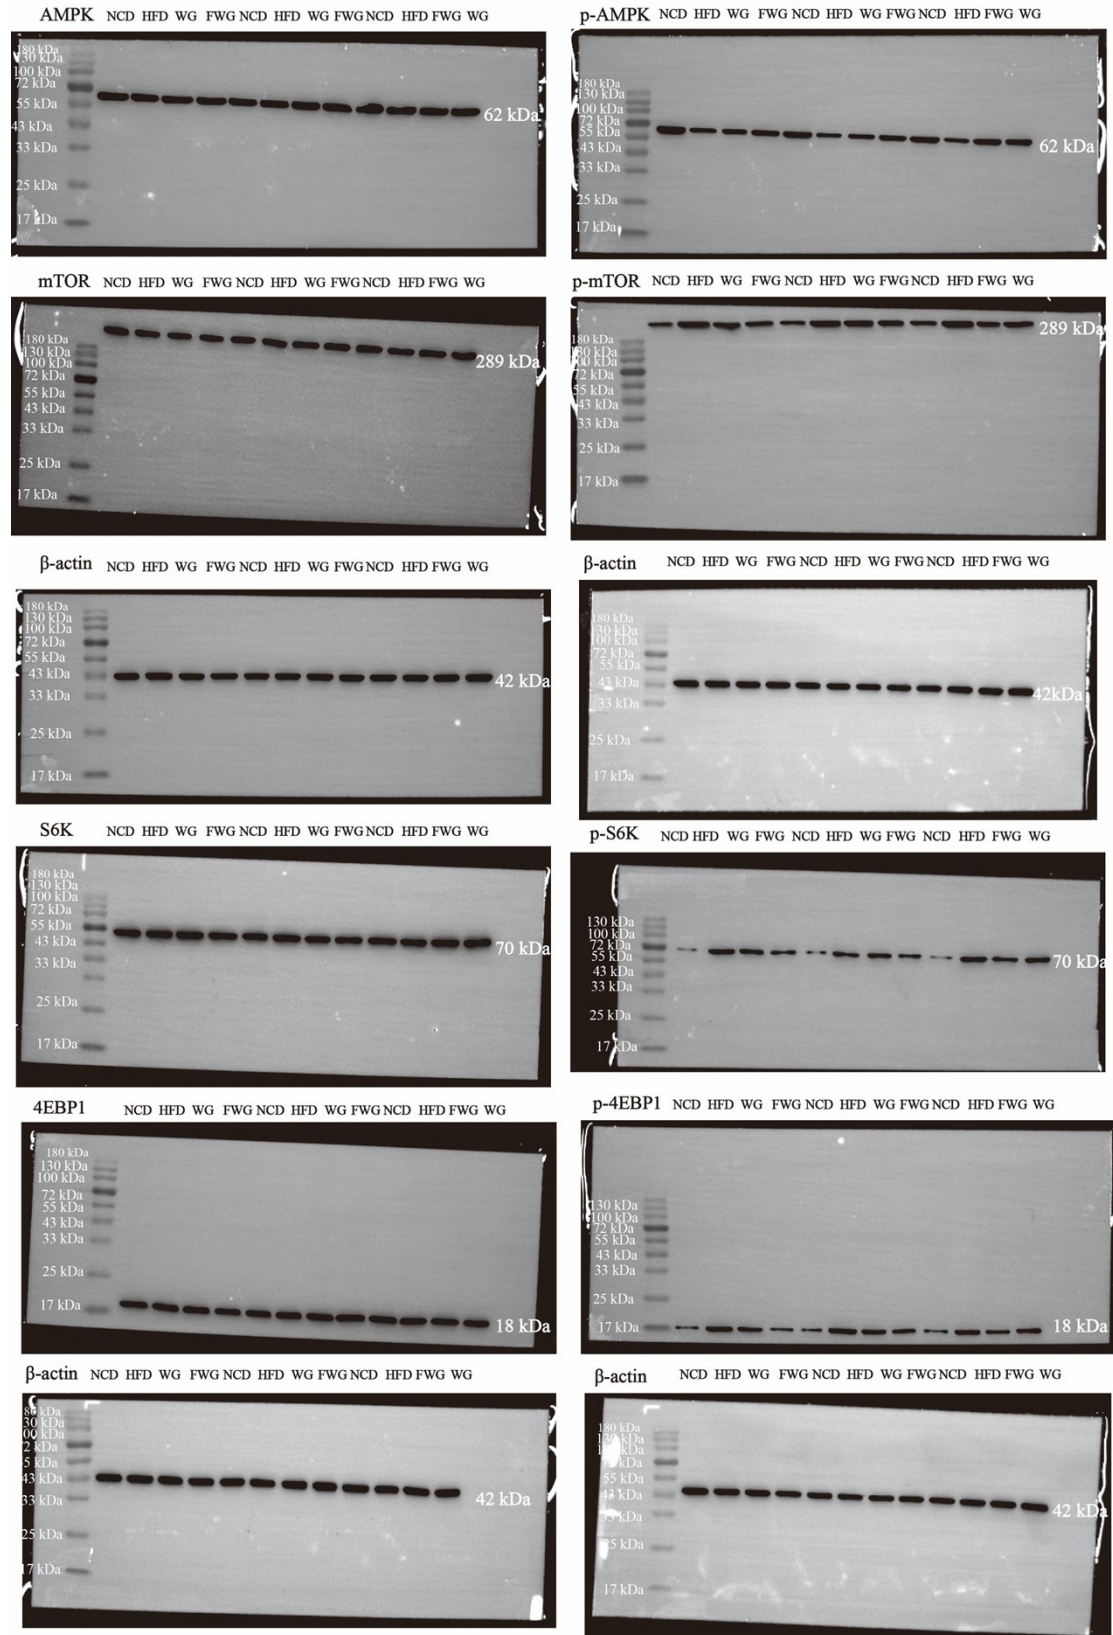

Fig. S2. Raw images of the electrophoretic gels and blots in Figure 6.
